# Supplementary material for: The predictability of reported drought events and impacts in the Ebro Basin using six different remote sensing data sets
Source: Copernicus journal article supplement (doi:10.5194/hess-21-4747-2017), 2017-09-22
Supplement: Supplementary file 1 [file hess-21-4747-2017-supplement.pdf]

Supplement of Hydrol. Earth Syst. Sci., 21, 4747–4765, 2017  
<https://doi.org/10.5194/hess-21-4747-2017-supplement>  
© Author(s) 2017. This work is distributed under  
the Creative Commons Attribution 3.0 License.

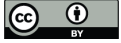

*Supplement of*

## **The predictability of reported drought events and impacts in the Ebro Basin using six different remote sensing data sets**

**Clara Linés et al.**

*Correspondence to:* Clara Linés (c.lines@un-ihe.org)

The copyright of individual parts of the supplement might differ from the CC BY 3.0 License.

Loc\_level codes:

- 1 Spain
- 2 Autonomous Community
- 3 Province
- 4 Comarca (local administrative division)
- 5 City/village
- 11 Ebro basin
- 12 Subabsin
- 13 Junta (management unit)
- 14 Comunidad de regantes (irrigation district)
- 15 River

\* records for areas within the Ebro basin but outside the selected study area for test 1 are in grey

| data_reported | sector         | type                            | data_start | data_end | data_ongoing | location                                        | loc_level | source              | description                                                                          | notes                            |
|---------------|----------------|---------------------------------|------------|----------|--------------|-------------------------------------------------|-----------|---------------------|--------------------------------------------------------------------------------------|----------------------------------|
| 04/09/2001    | agriculture    | production reduction            |            |          |              | Sep-01 Cariñena                                 | 4         | periodico de aragon | 30% reduction (55M kg less)                                                          |                                  |
| 27/03/2002    | agriculture    | water curtailments              | Mar-02     |          |              | Jul-02 Bardenas                                 | 14        | periodico de aragon | insufficient water available at the start of the irrigation session                  |                                  |
| 11/04/2002    | agriculture    | production loss                 |            |          |              | Apr-02 Aragon                                   | 2         | periodico de aragon | rainfed winter cereal (loss of 20%)                                                  |                                  |
| 26/04/2002    | politic        | acknowledgment                  | Apr-02     |          |              | Ebro basin                                      | 11        | periodico de aragon | acknowledgement of the impact by the MAGRAMA, Aragón, Navarra and La Rioja           |                                  |
| 25/07/2002    | environment    | water quality                   | Jul-02     | Jul-02   |              | Zaragoza                                        | 5         | periodico de aragon | flow below the minimum (30m3/s) to warranty water quality                            |                                  |
| 17/09/2002    | agriculture    | production loss                 |            |          |              | Matarraña, Bajo Aragón, Campo de Belchite       | 4         | periodico de aragon | olive oil (loss of 40-70%)                                                           |                                  |
| 17/09/2002    | agriculture    | production loss                 |            |          |              | Medio y Bajo Cinca y La Litera                  | 4         | periodico de aragon | olive oil (loss of 40-70%)                                                           |                                  |
| 24/02/2005    | livestock      | lack of pastures                |            |          |              | Feb-05 Aragon                                   | 2         | periodico de aragon | after 5 months without rain, increased costs for farmers                             |                                  |
| 01/03/2005    | agriculture    | production loss                 | Oct-04     |          |              | Mar-05 Zaragoza                                 | 3         | periodico de aragon | production loss in vegetables, price increase                                        | mentioned again on 06 Mar        |
| 03/03/2005    | politic        | mitigation measures             | Mar-05     |          |              | Aragon                                          | 2         | periodico de aragon | DGA increases up to 50% the set-aside of land (rainfed and irrigated)                |                                  |
| 03/03/2005    | agriculture    | production loss                 |            |          |              | Mar-05 Aragon                                   | 2         | periodico de aragon | 21% of cereal crops affected                                                         |                                  |
| 06/03/2005    | livestock      | lack of pasture, economic loss  |            |          |              | Mar-05 Aragon                                   | 2         | periodico de aragon | sheep                                                                                | mentioned again 22 Mar           |
| 06/03/2005    | agriculture    | production loss                 |            |          |              | Mar-05 Aragon                                   | 2         | periodico de aragon | herbaceous crops (600.000 has affected)                                              |                                  |
| 16/03/2005    | agriculture    | water stress                    | Mar-05     |          |              | Aragon                                          | 2         | periodico de aragon | rainfed winter cereal (90% affected)                                                 | mentioned again 22 Mar           |
| 16/03/2005    | agriculture    | water curtailments              | Mar-05     |          |              | Riegos del Alto Aragon                          | 14        | periodico de aragon | irrigation quota reduced from 8000 to 2750 m3                                        | mentioned again on 20 Mar, 19.07 |
| 17/03/2005    | fire           | increase in forest fires        | Jan-05     |          |              | Mar-05 Aragon                                   | 2         | periodico de aragon | and anticipation of the fire mitigation campaign                                     | mentioned again on 05 Apr        |
| 22/03/2005    | urban water    | risk declared (huesca)          | Mar-05     |          |              | Huesca                                          | 5         | periodico de aragon | declaration of risk and preparation of an emergency plan                             |                                  |
| 22/03/2005    | livestock      | increased costs                 | Mar-05     |          |              | Aragon                                          | 2         | periodico de aragon | sheep and goats, additional food and water (lack of pastures and water ponds)        |                                  |
| 22/03/2005    | livestock      | increased mortality             | Mar-05     |          |              | Aragon                                          | 2         | periodico de aragon | lams                                                                                 |                                  |
| 22/03/2005    | livestock      | increased costs                 | Mar-05     |          |              | Aragon                                          | 2         | periodico de aragon | breeding cattle, additional food and water (lack of pastures and meadows)            | mentioned again on 21 Apr        |
| 24/03/2005    | politic        | communication to UE             | Mar-05     | Mar-05   |              | Spain                                           | 1         | periodico de aragon | The Ministry communicates the drought situation to the UE                            |                                  |
| 01/04/2005    | agriculture    | water curtailments              | Apr-05     |          |              | Bardenas                                        | 14        | periodico de aragon | Decision to cut water to the irrigation channel for two weeks                        | mentioned again on 12 Mar        |
| 15/04/2005    | agriculture    | insufficient water              | Apr-05     |          |              | Bardenas, Alto Aragon, Aragon y Cataluña        | 14        | periodico de aragon | insufficient water for the irrigation campaign                                       |                                  |
| 21/04/2005    | drinking water | no supply                       | Apr-05     |          |              | Apr-05 Yebrá de Basa (Huesca)                   | 5         | periodico de aragon | several months without supply                                                        |                                  |
| 21/04/2005    | drinking water | no supply                       | Apr-05     |          |              | Lascuarre, Orós (Huesca)                        | 5         | periodico de aragon | water tank trucks required                                                           |                                  |
| 26/04/2005    | energy         | production loss                 | Jan-05     |          |              | Apr-05 Aragon                                   | 2         | periodico de aragon | 25% reduction for the period Jan-Mar                                                 |                                  |
| 28/04/2005    | environment    | increased mortality             |            |          |              | Apr-05 Chimillas (Huesca)                       | 5         | periodico de aragon | fish and crabs in a reservoir                                                        |                                  |
| 30/04/2005    | politic        | situation classified as extreme | Oct-04     |          |              | Apr-05 Aragon                                   | 2         | periodico de aragon | INM describes the situation for the past 7 months as extreme drought                 |                                  |
| 30/04/2005    | politic        | mitigation measures             | Apr-05     |          |              | Aragon                                          | 2         | periodico de aragon | DGA increases up to 75% the set-aside of land (irrigated)                            |                                  |
| 30/04/2005    | politic        | mitigation measures             | Apr-05     |          |              | Aragon                                          | 2         | periodico de aragon | DGA allows herding                                                                   |                                  |
| 04/05/2005    | drinking water | no supply                       | May-05     |          |              | Ribagorza                                       | 4         | periodico de aragon | 15 villages without normal supply from wells and springs, water tank trucks required |                                  |
| 04/05/2005    | agriculture    | crops lost                      | May-05     | May-05   |              | Los Monegros                                    | 4         | periodico de aragon | rainfed winter cereal crops completely lost                                          |                                  |
| 08/05/2005    | livestock      | increased costs                 |            |          |              | May-05 Aragon                                   | 2         | periodico de aragon | increase in hay price                                                                |                                  |
| 08/05/2005    | agriculture    | water curtailments              |            |          |              | May-05 Aragon                                   | 2         | periodico de aragon | all irrigated systems                                                                |                                  |
| 14/05/2005    | drinking water | no supply                       |            |          |              | May-05 Huesca                                   | 3         | periodico de aragon | 21 villages without normal supply from wells and springs, water tank trucks required |                                  |
| 14/05/2005    | urban water    | mitigation measures             |            |          |              | May-05 Huesca                                   | 5         | periodico de aragon | prohibition of filling swimming pools and watering gardens                           | mentioned again on 19.05, 02.06  |
| 14/05/2005    | urban water    | mitigation measures             |            |          |              | May-05 Aragon                                   | 2         | periodico de aragon | water saving campaigns                                                               |                                  |
| 14/05/2005    | fire           | increase in forest fires        |            |          |              | May-05 Aragon                                   | 2         | periodico de aragon | forest fires tripled for the period Jan-Apr                                          |                                  |
| 15/05/2005    | politic        | farmer demonstration            | May-05     | May-05   |              | Alto Aragon                                     | 14        | periodico de aragon | asking for more reservoirs                                                           |                                  |
| 31/05/2005    | politic        | economic loss                   | May-05     |          |              | May-05 Aragon                                   | 2         | periodico de aragon | local government estimates the losses in agriculture and livestock farming in 173 M  |                                  |
| 07/06/2005    | agriculture    | crops lost                      |            | Jun-05   |              | Alto Jalon                                      | 14        | periodico de aragon | rainfed cereal crops completely lost                                                 |                                  |
| 07/06/2005    | agriculture    | insufficient water              |            |          |              | Jun-05 Alto Jalon                               | 14        | periodico de aragon | jalon river in Torrehermosa is almost dry, the irrigation campaign is not possible   |                                  |
| 19/06/2005    | recreation     | insufficient water              |            |          |              | Jun-05 Cinca                                    | 15        | periodico de aragon | drought and aggregates extraction make rafting impossible for the first time         |                                  |
| 22/06/2005    | politic        | mitigation measures             | Jun-05     |          |              | Spain                                           | 1         | periodico de aragon | royal decree with aid measures published                                             |                                  |
| 19/07/2005    | agriculture    | water curtailments              |            |          |              | Jul-05 Bardenas                                 | 14        | periodico de aragon |                                                                                      |                                  |
| 19/07/2005    | agriculture    | water curtailments              |            |          |              | Jul-05 Canal Urgel                              | 14        | periodico de aragon |                                                                                      |                                  |
| 20/07/2005    | agriculture    | no water for irrigation         | Jul-05     |          |              | Alto Aragon                                     | 14        | periodico de aragon |                                                                                      |                                  |
| 26/07/2005    | agriculture    | economic loss                   |            |          |              | Jul-05 Aragon                                   | 2         | periodico de aragon | irrigated crops (corn, rice, fodder and sunflower) accumulate losses of 136 MA       |                                  |
| 02/08/2005    | agriculture    | production loss                 |            |          |              | Aug-05 Teruel                                   | 3         | periodico de aragon | reduction in cereal production. Cultivated surface was also less                     |                                  |
| 03/08/2005    | agriculture    | production loss                 | Ago 05     |          |              | Aragon                                          | 2         | periodico de aragon | 60% of cereal production lost (departamento aragonés de agricultura)                 |                                  |
| 06/08/2005    | agriculture    | yield reduction                 |            |          |              | Aug-05 Bardenas                                 | 14        | periodico de aragon | insufficient water for irrigation of corn crops (expected yield reduction of 50%),   |                                  |
| 11/08/2005    | agriculture    | yield reduction                 |            |          |              | Aug-05 Bardenas                                 | 14        | periodico de aragon | surface already reduced 1/3                                                          |                                  |
| 14/08/2005    | water quality  | low flows                       |            |          |              | Aug-05 Aragon                                   | 2         | periodico de aragon | alfalfa, less cuts (normally 6)                                                      |                                  |
| 19/08/2005    | agriculture    | irrigation water finished       |            |          |              | Aug-05 Monegros                                 | 14        | periodico de aragon | flow below security minimum (Aragon at Jaca, Isábena at Capella, Jalon at Grisen,    |                                  |
| 24/08/2005    | agriculture    | production loss                 |            |          |              | Alto Aragon                                     | 14        | periodico de aragon | Gállego at Zaragoza and Bubal)                                                       |                                  |
| 24/08/2005    | agriculture    | death of woody crops            |            |          |              | Aug-05 Grio y Percepiles (Zaragoza)             | 5         | periodico de aragon | objectives not reached                                                               |                                  |
| 25/08/2005    | agriculture    | water restrictions              | Aug-05     |          |              | Guatizalema y Gallego                           | 15        | periodico de aragon | 80% of cereal crops lost                                                             |                                  |
| 26/08/2005    | agriculture    | yield reduction                 |            |          |              | Aug-05 Alto Aragon y Canal de Aragon y Cataluña | 14        | periodico de aragon | cherry trees dying because of lack of water                                          |                                  |
| 08/09/2005    | energy         | production loss                 |            |          |              | Sep-05 Aragon                                   | 2         | periodico de aragon | first restrictions to traditional irrigation (from river water)                      |                                  |
| 13/09/2005    | agriculture    | yield reduction                 |            |          |              | Sep-05 Campo de Borja                           | 14        | periodico de aragon | 52% reduction of corn crops productivity (compared to 2004)                          |                                  |
| 17/09/2005    | water quality  | mitigation measures             |            |          |              | Sep-05 Gallego                                  | 15        | periodico de aragon | 40% reduction during the period Jan-Aug (compared to 2004)                           |                                  |
| 04/10/2005    | agriculture    | yield reduction                 |            |          |              | Oct-05 Calatayud                                | 14        | periodico de aragon | 25% yield reduction in grapes production, but ver good quality                       |                                  |
|               |                |                                 |            |          |              |                                                 |           |                     | CHE announces mitigation measures to prevent water quality problems                  |                                  |
|               |                |                                 |            |          |              |                                                 |           |                     | due to the ongoing industrial discharges and the low river flow                      |                                  |
|               |                |                                 |            |          |              |                                                 |           |                     | 20% reduction in wine production (with respect to 2004) [several factors]            |                                  |

|            |                |                                    |        |        |                                                               |    |                     |                                                                                                           |                                        |
|------------|----------------|------------------------------------|--------|--------|---------------------------------------------------------------|----|---------------------|-----------------------------------------------------------------------------------------------------------|----------------------------------------|
|            |                |                                    |        |        | Aragon at Jaca, Jalon at Grisen, Isabena at Capella,          |    |                     |                                                                                                           |                                        |
| 09/10/2005 | water quality  | low flows                          |        |        | Oct-05 Gallego at Zaragoza, Noguera Ribagorzana at Pont Suert | 15 | periodico de aragon | flows below the security minimum                                                                          |                                        |
| 11/10/2005 | agriculture    | suspension of winter irrigation    | Oct-05 | Feb-06 | Gallego and Cinca                                             | 15 | periodico de aragon | water reserved for urban supply                                                                           |                                        |
| 11/10/2005 | energy         | suspension of flows for hydroelect | Oct-05 |        | Gallego and Cinca                                             | 15 | periodico de aragon | water reserved for urban supply                                                                           |                                        |
| 11/10/2005 | fish farms     | production reduction               | Oct-05 |        | Gallego (Biescas) and Cinca (El Grado)                        | 15 | periodico de aragon | reduction agreed to reserve water for urban supply                                                        |                                        |
| 02/12/2005 | agriculture    | income reduction                   | Jan-05 | Dec-05 | Spain                                                         | 1  | periodico de aragon | income per work unit in agriculture decreased 8.2% in 2005                                                |                                        |
| 13/12/2005 | agriculture    | yield reduction                    |        |        | Dec-05 Bajo Aragón                                            | 14 | periodico de aragon | yield reduction in olive production                                                                       |                                        |
| 23/12/2005 | agriculture    | yield reduction                    | Jan-05 | Dec-05 | Aragon                                                        | 2  | periodico de aragon | yield reduction of 60% in winter cereal                                                                   |                                        |
| 23/12/2005 | agriculture    | production reduction               | Jan-05 | Dec-05 | Aragon                                                        | 2  | periodico de aragon | corn had a reduction of cultivated surface of 26,000 has                                                  |                                        |
| 23/12/2005 | agriculture    | production reduction               | Jan-05 | Dec-05 | Aragon                                                        | 2  | periodico de aragon | alfalfa, production reduction of 500,000 tons                                                             |                                        |
| 28/12/2005 | agriculture    | income reduction                   | Jan-05 | Dec-05 | Aragon                                                        | 2  | periodico de aragon | income reduction of 14% (with respect to 2004)                                                            |                                        |
| 12/02/2006 | environment    | population reduction               |        |        | Feb-06 Aragon                                                 | 2  | periodico de aragon | partridge population reduction due to drought and lack of food                                            |                                        |
| 18/02/2006 | environment    | low flows                          |        |        | Feb-06 Gallego y Martin                                       | 2  | periodico de aragon | flow below minimum to warrant ecosystem functioning                                                       |                                        |
| 18/02/2006 | energy         | production reduction               | Dec-05 | Feb-06 | Cinca-Esera                                                   | 15 | periodico de aragon | production reduced in 59%                                                                                 |                                        |
| 18/02/2006 | energy         | production reduction               | Dec-05 | Feb-06 | Aragon-Gallego                                                | 15 | periodico de aragon | production reduced in 30%                                                                                 |                                        |
| 18/02/2006 | energy         | production reduction               | Dec-05 | Feb-06 | Aragon                                                        | 2  | periodico de aragon | production reduced in 27.6%                                                                               |                                        |
| 04/03/2006 | fire           | increase in forest fires           | Jan-05 | Dec-05 | Zaragoza                                                      | 3  | periodico de aragon | forest fires increased in 65% during 2005, increased in burned has                                        |                                        |
| 04/03/2006 | drinking water | increased number of populations w  | Jan-05 | Dec-05 | Zaragoza                                                      | 3  | periodico de aragon | demand of water supply by the fire water tank trunks increased in 65% (44 population)                     |                                        |
| 16/03/2006 | agriculture    | economic loss                      | Jan-05 | Dec-05 | Riegos del Alto Aragon                                        | 14 | periodico de aragon | agriculture had 50 M losses because of drought                                                            |                                        |
|            |                |                                    |        |        |                                                               |    |                     | processing and distributing companies (agricultural sector)                                               |                                        |
|            |                |                                    |        |        |                                                               |    |                     | had 15M losses because of drought                                                                         |                                        |
|            |                |                                    |        |        |                                                               |    |                     | reduction in volume of transactions, employment reduced by 15%, prices don't cover                        |                                        |
| 16/03/2006 | primary        | business reduction                 |        |        | Mar-06 Aragon                                                 | 2  | periodico de aragon | production losses, agriculture productivity reduced by 39%                                                |                                        |
| 02/04/2006 | agriculture    | water curtailments                 |        |        | Mar-06 Riegos del Alto Aragon                                 | 14 | periodico de aragon | water curtailments still ongoing                                                                          | mentioned again on 8/04                |
| 06/04/2006 | agriculture    | income reduction                   | Jan-05 | Dec-05 | Aragon                                                        | 2  | periodico de aragon | reduction in agricultural cooperative's income (600 M, 100M less than 2004)                               |                                        |
| 08/04/2006 | agriculture    | water curtailments                 |        |        | Apr-06 Canal de Aragon y Cataluña                             | 14 | periodico de aragon |                                                                                                           | mentioned again on 07 June             |
| 08/04/2006 | agriculture    | water curtailments                 |        |        | Apr-06 Jalon                                                  | 15 | periodico de aragon |                                                                                                           |                                        |
| 30/05/2006 | agriculture    | damage                             |        |        | May-06 Aragon                                                 | 2  | periodico de aragon | winter cereal losses estimated in 30-50% by Asaja                                                         |                                        |
| 30/05/2006 | livestock      | lack of pasture, economic loss     |        |        | May-06 Aragon                                                 | 2  | periodico de aragon | lack of pastures for sheep                                                                                |                                        |
| 07/06/2006 | environment    | low flows                          | Jun-06 | Jun-06 | Ebro                                                          | 15 | periodico de aragon | Ebro at Zaragoza below environmental flow for some days                                                   |                                        |
| 07/06/2006 | environment    | low flows                          | Jun-06 | Jun-06 | Jalon at Grisen, Matarraña at Nonaspe, Jiloca at Morata       | 15 | periodico de aragon | flow below environmental/security flow                                                                    | mentioned again on 10/07               |
| 07/06/2006 | environment    | low flows                          | Jun-06 | Jun-06 | Gallego at Bubal and Zaragoza                                 | 15 | periodico de aragon | flow below environmental/security flow                                                                    | mentioned again on 10/07               |
| 10/06/2006 | energy         | production reduction               |        |        | Jun-06 Jalon                                                  | 15 | periodico de aragon | four plants at Jalon river closed for four days due to lack of water                                      |                                        |
| 10/06/2006 | energy         | production reduction               |        |        | Jun-06 left bank                                              | 6  | periodico de aragon | current production 75% less than a normal year                                                            |                                        |
| 10/06/2006 | energy         | production reduction               |        |        | Jun-06 esera                                                  | 15 | periodico de aragon | production 32% less than a normal year                                                                    |                                        |
| 10/06/2006 | energy         | production reduction               |        |        | Jun-06 cinca                                                  | 15 | periodico de aragon | production 30% less than a normal year                                                                    |                                        |
| 10/06/2006 | energy         | production reduction               |        |        | Jun-06 Gallego and Jalon                                      | 15 | periodico de aragon | production 85% less than a normal year                                                                    |                                        |
| 10/06/2006 | agriculture    | impossibility of harvesting        |        |        | Jun-06 Aragon                                                 | 2  | periodico de aragon | impossibility of harvesting winter cereal in certain areas                                                |                                        |
| 14/06/2006 | agriculture    | water curtailments                 |        |        | Jun-06 Canal de Aragon y Cataluña                             | 14 | periodico de aragon | insufficient water to complete the irrigation campaign                                                    | mentioned again on 28/06, 11/07, 29/07 |
| 24/06/2006 | environment    | increase in CO2 emissions          | Jan-05 | Dec-05 | Aragon                                                        | 2  | periodico de aragon | need to substitute hydroelectricity with other sources                                                    |                                        |
| 24/06/2006 | energy         | reduction in production            | Jan-05 | Dec-05 | Aragon                                                        | 2  | periodico de aragon | production reduced by 49% compared to average year                                                        |                                        |
|            |                |                                    |        |        |                                                               |    |                     | water restrictions in almost 120 villages and                                                             |                                        |
| 24/06/2006 | drinking water | restrictions                       | Jan-05 | Dec-05 | Pyrenees                                                      | 6  | periodico de aragon | supply with water tank trucks to half of them                                                             |                                        |
| 29/06/2006 | environment    | low flows                          |        |        | Jun-06 Ebro                                                   | 15 | periodico de aragon | flow at river mouth below environmental flow                                                              |                                        |
| 29/06/2006 | environment    | low flows                          |        |        | Jun-06 Matarraña at Nonaspe, Piedra at Carena                 | 15 | periodico de aragon | flow below environmental limit                                                                            |                                        |
| 11/07/2006 | agriculture    | economic losses                    |        |        | Jul-06 Aragon                                                 | 2  | periodico de aragon | 2000 family farms close to bankruptcy                                                                     |                                        |
| 11/07/2006 | agriculture    | water curtailments                 |        |        | Jul-06 Alto Aragon                                            | 14 | periodico de aragon | water quotas reduced by 50%                                                                               |                                        |
| 11/07/2006 | agriculture    | crop change                        |        |        | Jul-06 Riegos del Alto Aragon                                 | 14 | periodico de aragon | 40% of the surface of fodder, corn and rice crops substituted by winter cereal                            |                                        |
| 11/07/2006 | agriculture    | crop change                        |        |        | Jul-06 Bardenas                                               | 14 | periodico de aragon | vegetable crops substituted by winter cereal                                                              |                                        |
| 11/07/2006 | agriculture    | income reduction                   |        |        | Jul-06 Bardenas                                               | 14 | periodico de aragon | no new machinery bought and no expenses in maintenance unless unavoidable                                 |                                        |
| 12/07/2006 | livestock      | increase of costs                  |        |        | Jul-06 Farlete                                                | 5  | periodico de aragon | no pastures and no water (needs to be carried 15-20km by shepherds)                                       |                                        |
| 13/07/2006 | energy         | increase of costs                  | Oct-04 | Oct-05 | Aragon                                                        | 2  | periodico de aragon | substitution of energy source (to thermal) produced an increase in cost of 206 M                          |                                        |
| 09/08/2006 | agriculture    | surface reduction                  |        |        | Ago 06 Aragon                                                 | 2  | periodico de aragon | some districts were not able to cultivate more than 20% of the surface                                    |                                        |
| 15/08/2006 | agriculture    | yield reduction                    |        |        | Ago 06 Aragon                                                 | 2  | periodico de aragon | reduction of 6% in grape production                                                                       |                                        |
| 19/08/2006 | agriculture    | production reduction               |        |        | Ago 06 Aragon                                                 | 2  | periodico de aragon | reduction of 36% in rainfed winter cereal production (with respect to 6 year mean)                        |                                        |
| 19/08/2006 | agriculture    | crop change                        |        |        | Ago 06 Aragon                                                 | 2  | periodico de aragon | 2500 has of rice crops less than 2004                                                                     |                                        |
| 11/09/2006 | energy         | production reduction               |        |        | Sep-06 Aragon                                                 | 2  | periodico de aragon | current production of hydroelectricity is less than a third of potential production                       |                                        |
| 31/10/2006 | environment    | low flows                          | Oct-06 |        | Piedra at Carenas, Martin at Hajar, Matarraña at Nonaspe      | 15 | periodico de aragon | river flow below the security minimum                                                                     | mentioned again on 06/12, 19/12        |
| 31/10/2006 | environment    | low flows                          | Oct-06 |        | Huerva at Mezalocha, Pena at Valderrobes                      | 15 | periodico de aragon | river flow below the security minimum                                                                     |                                        |
| 31/10/2006 | agriculture    | production reduction               |        |        | Oct-06 Teruel                                                 | 3  | periodico de aragon | reduction in olives production                                                                            |                                        |
| 16/01/2007 | urban water    | mitigation measures                | Jan-07 |        | Ebro headwaters                                               | 6  | periodico de aragon | low flow at Ebro headwaters, Zaragoza urban supply depends on it                                          |                                        |
| 18/02/2007 | social         | migration                          | Jan-05 |        | Jan-07 Monegrillo                                             | 15 | periodico de aragon | population reduction due to impossibility of harvesting and sheep farms crisis (517 to 495)               |                                        |
| 14/05/2007 | agriculture    | production reduction               | Apr-06 | Apr-07 | Aragon                                                        | 2  | periodico de aragon | reduction in olive oil production of 16% for 2006-2007 campaign (compared to five year mean)              |                                        |
| 24/06/2007 | agriculture    | crop change                        | Nov-06 |        | Jun-07 Aragon                                                 | 2  | periodico de aragon | farmers plant cereal in irrigated areas instead of corn or fodder for the third year (decision in autumn) |                                        |
| 24/06/2007 | agriculture    | crop change                        | Oct-06 |        | Jun-07 Riegos del Alto Aragon                                 | 14 | periodico de aragon | half of the surface dedicated to cereal instead of more productive crops (normally is one third)          |                                        |
| 24/06/2007 | agriculture    | crop change                        | Oct-06 |        | Jun-07 Bardenas                                               | 14 | periodico de aragon | 30,000 has of cereal and 11,000 (14%) left fallow                                                         |                                        |
| 09/07/2007 | agriculture    | economic loss                      | Oct-04 | Dec-06 | Riegos del Alto Aragon                                        | 14 | periodico de aragon | drought during 05-06 campaigns produced losses of 90M                                                     |                                        |
| 21/07/2007 | environment    | dry springs                        | Jul-07 |        | Ordesa                                                        | 6  | periodico de aragon | (report of the irrigation district)                                                                       |                                        |
| 06/08/2007 | drinking water | supply interruption                |        |        | Aug-07 Fornoles (Teruel)                                      | 5  | periodico de aragon | acquirers still recovering from past drought                                                              |                                        |
|            |                |                                    |        |        |                                                               |    |                     | supply by water tank trucks required                                                                      |                                        |
| 07/08/2007 | drinking water | supply interruption                |        |        | Aug-07 Alto Gallego (Ibor, Orna del Gallego)                  | 5  | periodico de aragon | supply by water tank trucks required                                                                      |                                        |
| 30/10/2007 | environment    | low flows                          | Oct-07 |        | Aragon at Jaca, Isabena at Capella, Piedra at Carenas,        | 15 | periodico de aragon | flows below the security minimum                                                                          |                                        |
| 13/11/2007 | agriculture    | reduced discharge                  | Nov-07 |        | Martin at Hajar, Matarraña at Nonaspe, Huerva at Zaragoza     | 15 | periodico de aragon | Reservoir withdrawal comissions decide to reduce discharge                                                |                                        |
| 13/11/2007 | agriculture    | water stress                       |        |        | Cinca and Gallego                                             | 2  | periodico de aragon | young trees under water stress because of lack of water (dry soil up to 1 m depth)                        |                                        |
|            |                |                                    |        |        | Nov-07 Aragon                                                 | 2  | periodico de aragon | not enough soil moisture to plant cereal (required for seed germination)                                  |                                        |
| 13/11/2007 | agriculture    | dry soil                           |        |        | Nov-07 Aragon                                                 | 2  | periodico de aragon | in most parts of the region                                                                               |                                        |
| 14/11/2007 | environment    | low flows                          | Nov-07 | Nov-07 | Mequinenza-Ribarroja reservoirs                               | 5  | periodico de aragon | flows below the security minimum for the past weeks                                                       |                                        |

|            |                  |                                       |        |        |        |                                                                                                                                                                                 |    |                     |                                                                                                                                             |                                                                        |
|------------|------------------|---------------------------------------|--------|--------|--------|---------------------------------------------------------------------------------------------------------------------------------------------------------------------------------|----|---------------------|---------------------------------------------------------------------------------------------------------------------------------------------|------------------------------------------------------------------------|
| 14/11/2007 | energy           | reduction in production               |        |        | Nov-07 | Mediano, El Grado, Bubal, Lanuza reservoirs                                                                                                                                     | 15 | periodico de aragon | insufficient water in reservoir                                                                                                             |                                                                        |
| 20/11/2007 | agriculture      | low production                        | Oct-07 |        | Nov-07 | Zaragoza area                                                                                                                                                                   | 5  | periodico de aragon | low vegetable production because of drought during the past five weeks (water from the channel is interrupted because of maintenance works) |                                                                        |
| 01/12/2007 | agriculture      | water curtailments                    | Dec-07 |        |        | Ebro basin                                                                                                                                                                      | 11 | periodico de aragon | CHE implementes water saving measures that affect the agriculture                                                                           |                                                                        |
| 05/12/2007 | agriculture      | yield reduction                       |        |        | Dec-07 | Aragon                                                                                                                                                                          | 2  | periodico de aragon | olives are too small to be sold as table olives (only 5% can be destined to this use)                                                       |                                                                        |
| 05/12/2007 | agriculture      | tree damage                           |        |        | Dec-07 | Aragon                                                                                                                                                                          | 2  | periodico de aragon | 19,000 has of almond trees affected, 30% of mortality, 95M in losses                                                                        |                                                                        |
| 05/12/2007 | agriculture      | lack of pasture, economic loss        |        |        | Dec-07 | Aragon                                                                                                                                                                          | 2  | periodico de aragon | 300,000 euro of daily losses in sheep farming because of lack of pastures                                                                   |                                                                        |
| 09/12/2007 | agriculture      | production reduction                  |        |        | Dec-07 | Teruel                                                                                                                                                                          | 3  | periodico de aragon | truffles: less production (wild and cultivated), only Gudar and Javalambre had good production due to rains in August                       |                                                                        |
| 18/12/2007 | agriculture      | production reduction                  |        |        | Dec-07 | Campo de Belchite                                                                                                                                                               | 4  | periodico de aragon | 20% reduction in olive oil production due to drought and winter frost (compared to 2006)                                                    |                                                                        |
| 24/12/2007 | social           | rogations                             | Dec-07 | Dec-07 |        | Altoaragon                                                                                                                                                                      | 14 | periodico de aragon | to ask for rain                                                                                                                             |                                                                        |
| 10/01/2008 | agriculture      | economic loss                         | Jan-05 | Dec-05 |        | Ebro basin                                                                                                                                                                      | 11 | periodico de aragon | income loss in the agricultural sector of 405 M (source Perez y Perez 2009)                                                                 |                                                                        |
| 10/01/2008 | energy           | economic loss                         | Jan-05 | Dec-05 |        | Ebro basin                                                                                                                                                                      | 11 | periodico de aragon | income loss in hydroelectricity production of 72 M (source Perez y Perez 2009)                                                              |                                                                        |
| 10/01/2008 | agriculture      | economic loss                         | Jan-05 | Dec-05 |        | Ebro basin                                                                                                                                                                      | 11 | periodico de aragon | income loss in agrofood chain of 271 M (source Perez y Perez 2009)                                                                          |                                                                        |
| 10/01/2008 | employment       | employment reduction                  | Jan-05 | Dec-05 |        | Ebro basin                                                                                                                                                                      | 11 | periodico de aragon | employment reduced in 11,275 jobs                                                                                                           |                                                                        |
| 28/01/2008 | energy           | production reduction                  | Jan-07 | Dec-07 |        | Aragon                                                                                                                                                                          | 2  | periodico de aragon | less than 2200Gw were produce (average year is 2700Gw)                                                                                      |                                                                        |
| 28/01/2008 | energy           | production reduction                  | Jan-07 | Dec-07 |        | Jalon                                                                                                                                                                           | 12 | periodico de aragon | 69,8 Gw were produced (57% of average production)                                                                                           |                                                                        |
| 28/01/2008 | energy           | production reduction                  | Jan-07 | Dec-07 |        | Aragon-Gallego                                                                                                                                                                  | 12 | periodico de aragon | 449,5 M kw (72% of average production)                                                                                                      |                                                                        |
| 28/01/2008 | energy           | production reduction                  | Jan-07 | Dec-07 |        | Noguera-Ribagorzana                                                                                                                                                             | 12 | periodico de aragon | 162,6 M kw (74% of average production)                                                                                                      |                                                                        |
| 05/02/2008 | environment      | low flows                             |        |        | Feb-08 | Aragon river                                                                                                                                                                    | 15 | periodico de aragon | flow 2/3 of the required for ecosystem health                                                                                               |                                                                        |
| 05/02/2008 | environment      | low flows                             |        |        | Feb-08 | Esera                                                                                                                                                                           | 15 | periodico de aragon | flow 1/3 of the environmental flow                                                                                                          |                                                                        |
| 10/02/2008 | employment       | employment reduction                  | Jan-06 | Dec-06 |        | Ebro basin                                                                                                                                                                      | 11 | periodico de aragon | 5500 people less working in agriculture in the area at the end of this period                                                               |                                                                        |
| 10/02/2008 | employment       | employment reduction                  | Jan-07 | Dec-07 |        | Ebro basin                                                                                                                                                                      | 11 | periodico de aragon | 7700 people less working in agriculture in the area at the end of this period                                                               |                                                                        |
| 10/02/2008 | agriculture      | economic loss                         | Jan-05 | Dec-05 |        | La Hoya, Somontano, Los Monegros                                                                                                                                                | 4  | periodico de aragon | income reduction of 50M (source: report by Riegos del Alto Aragon)                                                                          |                                                                        |
| 10/02/2008 | agriculture      | indus economic loss                   | Jan-05 | Dec-05 |        | La Hoya, Somontano, Los Monegros                                                                                                                                                | 4  | periodico de aragon | economic activity reduction of 30%, income reduction of 15M (source: report by Riegos del Alto Aragon)                                      |                                                                        |
| 10/02/2008 | agriculture      | indus economic loss                   | Jan-06 | Dec-06 |        | La Hoya, Somontano, Los Monegros                                                                                                                                                | 4  | periodico de aragon | income reduction of 10M (source: report by Riegos del Alto Aragon)                                                                          |                                                                        |
| 10/02/2008 | agriculture      | indus economic loss                   | Jan-06 | Dec-06 |        | La Hoya, Somontano, Los Monegros                                                                                                                                                | 4  | periodico de aragon | activity remains low                                                                                                                        |                                                                        |
| 10/02/2008 | agriculture      | crop change                           |        |        | Feb-08 | Riegos del Alto Aragon                                                                                                                                                          | 14 | periodico de aragon | farmers decide to plant barley in irrigated areas due to low water availability                                                             |                                                                        |
| 10/02/2008 | agriculture      | crop delay                            |        |        | Feb-08 | Riegos del Alto Aragon                                                                                                                                                          | 14 | periodico de aragon | broccoli crops have two months delay in growth because they could only receive irrigation once (in Nov)                                     |                                                                        |
| 10/02/2008 | environment      | tree mortality                        |        |        | Feb-08 | Teruel and pre-pyrenees                                                                                                                                                         | 3  | periodico de aragon | tree deaths because of dryness                                                                                                              |                                                                        |
| 11/02/2008 | energy           | production reduction                  |        | Jul-08 | Feb-08 | Ebro basin                                                                                                                                                                      | 11 | periodico de aragon | agreed reduction in turbine discharge, production is at 40%                                                                                 | improvement mentioned 18.08                                            |
|            |                  |                                       |        |        |        | Bilesa (Cinca-Cinqueta), Aratores and Castiello (Aragon), San Mateo (Gallego), El Grado I (Cinca), Huermeda, La Morca                                                           |    |                     |                                                                                                                                             |                                                                        |
| 12/02/2008 | energy           | production reduction                  |        |        | Feb-08 | and La Morana (Jalon), Rivera (Martin), Castielfabib                                                                                                                            | 15 | periodico de aragon | production stopped in 10 hydroelectrical plants due to lack of water                                                                        |                                                                        |
| 12/02/2008 | water managemens | saving measures                       |        | Feb-08 |        | Aragon                                                                                                                                                                          | 2  | periodico de aragon | flows reduced in the main rivers to save water for the summer low flows                                                                     |                                                                        |
| 12/02/2008 | livestock        | unrest                                |        |        | Feb-08 | Aragon                                                                                                                                                                          | 2  | periodico de aragon | farmers claim for mitigation measures to the crisis in their sector caused by drought and high cereal prices                                |                                                                        |
| 13/02/2008 | environment      | low flows                             | Feb-08 |        | Feb-08 | Aragon and Gallego                                                                                                                                                              | 15 | periodico de aragon | flows will be reduced by 500/s below the security minimum each month to save water                                                          |                                                                        |
| 15/02/2008 | politic          | mitigation measures                   | Feb-08 |        | Feb-08 | Ebro basin                                                                                                                                                                      | 11 | periodico de aragon | Government decree with drought mitigation measures approved                                                                                 |                                                                        |
| 16/02/2008 | drinking water   | supply by water tank truck            |        |        | Feb-08 | Towns in the pyrenees                                                                                                                                                           | 5  | periodico de aragon | supply aquifers dry since the summer                                                                                                        |                                                                        |
| 20/2/2008  | drinking water   | supply problems                       |        |        | Feb-08 | 183 towns                                                                                                                                                                       | 5  | periodico de aragon | especially in the left bank                                                                                                                 |                                                                        |
| 20/02/2008 | agriculture      | unrest                                |        |        | Feb-08 | Valdealgrofa                                                                                                                                                                    | 5  | periodico de aragon | more than 200 demonstrated claiming for government assistance                                                                               |                                                                        |
| 01/03/2008 | fire             | increase in the number of fires       |        |        | Mar-08 | Aragon                                                                                                                                                                          | 2  | periodico de aragon | because of drought and high temperatures. 112 forest fires                                                                                  |                                                                        |
| 07/03/2008 | agriculture      | economic loss                         | Jan-07 | Dec-07 |        | Bajo Aragon Historico, Caspe y Belchite                                                                                                                                         | 4  | periodico de aragon | in Jan-Feb (10 year average 51) and 116 non-forest fires                                                                                    |                                                                        |
| 11/03/2008 | agriculture      | water curtailments                    | Mar-08 |        |        | Riegos del Alto Aragon                                                                                                                                                          | 14 | periodico de aragon | losses of 21M during the past campaign, especially in olive and almond trees                                                                |                                                                        |
| 18/03/2008 | environment      | tree mortality                        |        |        | Mar-08 | Valtorres (Zaragoza)                                                                                                                                                            | 5  | periodico de aragon | irrigation season start with the lowest quota in 60 years (2400m3/ha)                                                                       |                                                                        |
| 20/03/2008 | agriculture      | loss of profit                        | Jan-07 | Dec-07 |        | Riegos del Alto Aragon                                                                                                                                                          | 14 | periodico de aragon | DGA removes pine trees killed by the lack of precipitations                                                                                 | mentioned again on 07.04                                               |
| 21/03/2008 | water quality    | diminution of water quality           |        |        | Mar-08 | Aragon                                                                                                                                                                          | 2  | periodico de aragon | 324 M of profit loss for not being able to plant corn last season                                                                           |                                                                        |
| 27/03/2008 | environment      | low flows                             |        |        | Mar-08 | Esera at Eriste, Isábena at Capella, Gallego at Bubal                                                                                                                           | 15 | periodico de aragon | because of lower flows                                                                                                                      |                                                                        |
| 01/04/2008 | environment      | low flows                             |        |        | Apr-08 | Esera, Gallego at Bubal, Soton at Ortila                                                                                                                                        | 15 | periodico de aragon | flow significantly below the security minimum                                                                                               |                                                                        |
| 04/04/2008 | drinking water   | water tank trucks required            |        |        | Apr-08 | Aragon                                                                                                                                                                          | 2  | periodico de aragon | flows below the security minimum                                                                                                            |                                                                        |
| 06/04/2008 | drinking water   | dry wells                             |        |        | Apr-08 | Blesa (Teruel)                                                                                                                                                                  | 5  | periodico de aragon | water tank trucks start to distribute water to some towns                                                                                   |                                                                        |
| 06/04/2008 | livestock        | dry ponds                             |        |        | Apr-08 | Farlete and Monegrillo                                                                                                                                                          | 5  | periodico de aragon | supply by water tank trucks required                                                                                                        | mentioned again on 8.05                                                |
| 08/04/2008 | environment      | CO2 emissions                         | Jan-07 | Dec-07 |        | Spain?                                                                                                                                                                          | 1  | periodico de aragon | farmers need to carry water for the sheep, 5000 sheep sold                                                                                  |                                                                        |
| 10/04/2008 | livestock        | crisis                                |        |        | Apr-08 | Aragon                                                                                                                                                                          | 2  | periodico de aragon | emissions from the energy and industrial sectors increased by 3% (compared to 2006)                                                         |                                                                        |
| 13/04/2008 | politic          | political tension                     |        |        | Apr-08 | Spain                                                                                                                                                                           | 2  | periodico de aragon | sheep farming in crisis due to the increase of the cereal prices and drought (lack of pastures)                                             | mentioned again on 11.04                                               |
| 30/04/2008 | agriculture      | water curtailments                    |        |        | Apr-08 | Canal Aragon y Cataluña                                                                                                                                                         | 14 | periodico de aragon | other regions claim water transfers from the ebro                                                                                           |                                                                        |
| 04/05/2008 | agriculture      | crop yield reduction                  |        |        | May-08 | Bajo Aragon                                                                                                                                                                     | 15 | periodico de aragon | cereal crops affected by drought (mentioned in interview, affected during the winter?)                                                      |                                                                        |
| 04/05/2008 | wildlife         | population reduction                  | Jan-07 | Dec-07 |        | Ordesa                                                                                                                                                                          | 4  | periodico de aragon | reduction in population of frogs in the national park in the ravines fed by acquifers (not recovered from previous drought)                 |                                                                        |
| 15/08/2008 | agriculture      | yield reduction                       |        |        | Aug-08 | Cinco Villas (and Bajo Ebro and Caspe)                                                                                                                                          | 5  | periodico de aragon | reduction in cereal production (12.5% less in Aragon compared to 2007)                                                                      | mentioned again 30.09 (mainly in valle del Ebro, Bajo Cinca and Caspe) |
| 12/08/2009 | agriculture      | yield reduction                       |        | Aug-09 |        | Aragon                                                                                                                                                                          | 2  | periodico de aragon | yield reduced because of drought, frost and hail                                                                                            |                                                                        |
| 09/02/2011 | agriculture      | sprout problems                       |        |        | Feb-11 | Riegos del Alto Aragon                                                                                                                                                          | 14 | periodico de aragon | problems in sprouting of winter cereal because of drought                                                                                   | mentioned again several times                                          |
|            |                  |                                       |        |        |        | Aragón (in particular La Litera, Cinca Medio, Monegros and Bajo Cinca, Alto Aragón. In Zaragoza the most affected are Ribera Baja de Ebro, Bajo Aragón-Caspe, Comarca Zaragoza, |    |                     |                                                                                                                                             |                                                                        |
| 07/03/2011 | agriculture      | damage                                |        |        | Mar-11 | Ribera Alta del Ebro, Campo de Borja, Cinco Villas...)                                                                                                                          | 4  | periodico de aragon | damge to 60% of herbaceous crops surface                                                                                                    |                                                                        |
| 09/03/2011 | agriculture      | damage                                |        |        | Mar-11 | Aragon                                                                                                                                                                          | 2  | periodico de aragon | woody crops                                                                                                                                 |                                                                        |
| 09/03/2011 | livestock        | lack of pasture, increase of expenses |        |        | Mar-11 | Aragon                                                                                                                                                                          | 2  | periodico de aragon |                                                                                                                                             | mentioned again on 9.10                                                |
| 15/07/2011 | water quality    | low flows                             |        |        | Jul-11 | Matarraña at Nonaspe, Arba de Luesia dry at Biota.                                                                                                                              | 15 | periodico de aragon | flows significantly below the minimum to warranty water quality                                                                             |                                                                        |
| 02/08/2011 | livestock        | lack of pasture, increase of expenses |        |        | Aug-11 | Pyrenees                                                                                                                                                                        | 6  | periodico de aragon | farmers need to buy food for the animals                                                                                                    |                                                                        |
| 02/08/2011 | agriculture      | water curtailments                    | Jul-11 |        | Aug-11 | Bardenas                                                                                                                                                                        | 14 | periodico de aragon |                                                                                                                                             | mentioned again 25.08                                                  |
| 03/08/2011 | agriculture      | water stress                          |        |        | Aug-11 | Bardenas                                                                                                                                                                        | 14 | periodico de aragon | affects mainly corn, alfalfa, rice, vegetables and sunflower. Most of the crops require irrigation until september                          |                                                                        |

|            |                    |                                            |        |        |        |                                                                                                                              |    |                     |                                                                                        |                                     |
|------------|--------------------|--------------------------------------------|--------|--------|--------|------------------------------------------------------------------------------------------------------------------------------|----|---------------------|----------------------------------------------------------------------------------------|-------------------------------------|
| 05/08/2011 | water quality      | low flows                                  | Jul-11 |        | Aug-11 | Ebro at Zaragoza                                                                                                             | 15 | periodico de aragon | flow below the security minimum (tree times in two weeks)                              |                                     |
| 10/08/2011 | energy             | reduction in production                    |        |        | Aug-11 | Aragon                                                                                                                       | 2  | periodico de aragon | due to low flows.                                                                      | mentioned again on 23.08            |
| 15/08/2011 | agriculture        | water curtailments                         | Jul-11 | Aug-11 |        | Alto Aragon                                                                                                                  | 14 | periodico de aragon | less water to alfalfa to favour corn and rice (29.09),                                 | mentioned again on 25.08            |
| 15/08/2011 | agriculture        | water curtailments                         |        |        | Aug-11 | Canal de Aragon y Cataluña                                                                                                   | 14 | periodico de aragon | 50% fodder irrigated only at intervals of 16 days (01.10)                              | mentioned again on 25.08            |
| 23/08/2011 | recreation         | rafting not possible                       |        |        | Aug-11 | gallego                                                                                                                      | 14 | periodico de aragon | because of low flows                                                                   |                                     |
| 24/08/2011 | water supply       | to villages                                |        |        | Aug-11 | 3 Villages in Teruel                                                                                                         | 5  | periodico de aragon | supply with water tank trucks to villages with external supply (well),                 |                                     |
| 15/09/2011 | environment        | forest mortality                           |        |        | Sep-11 | Soto Cantalobos (Zaragoza)                                                                                                   | 5  | periodico de aragon | summer increase of population                                                          | mentioned again on 28.09            |
| 09/10/2011 | agriculture        | production reduction                       |        |        | Oct-11 | Caspe (Zaragoza)                                                                                                             | 5  | periodico de aragon | cereal production half of a normal year, irrigated 20% lower, almonds 80% lower        |                                     |
| 09/10/2011 | agriculture        | lack of soil moisture                      |        |        | Oct-11 | Aragon                                                                                                                       | 2  | periodico de aragon | impedes the use of machinery to prepare the fields for the new crops                   | mentioned again on 25.10            |
| 09/10/2011 | water supply       | to villages                                | Oct-11 |        | Oct-11 | villages in the Pyrenees (eg Roda de Isabena)                                                                                | 5  | periodico de aragon | because of dry aquifers, villages require supply by water tank trucks                  | mentioned again on 19.10            |
| 09/10/2011 | water restriction: | to water garden, fill swimming pools etc   |        |        | Oct-11 | Ainsa (Huesca)                                                                                                               | 5  | periodico de aragon | to save water for nearby villages                                                      |                                     |
| 11/10/2011 | forest fires       | restrictions                               |        |        | Oct-11 | Aragon                                                                                                                       | 2  | periodico de aragon | period of restrictions extended                                                        | mentioned again on 18.10            |
|            |                    |                                            |        |        |        | Aragon (especially Cinco Villas district (Zaragoza); Jiloca (Teruel); Bajo Cinca, Jacetania, La Hoya and Ribagorza (Huesca)) |    |                     | problems of supply in villages that depend on aquifers, wells, springs.                |                                     |
| 19/10/2011 | water supply       | to villages                                |        |        | Oct-11 | Aragon                                                                                                                       | 4  | periodico de aragon | Water tank trucks required                                                             |                                     |
| 04/03/2012 | water supply       | to villages                                | Aug-11 | Nov-11 |        | Jiloca                                                                                                                       | 15 | periodico de aragon | water tank trucks required                                                             |                                     |
| 20/10/2011 | hunting            | reduction in numer and weakness of animals |        |        | Oct-11 | Aragon                                                                                                                       | 2  | periodico de aragon | partidge bird chiks mortality because of lack of water, risk of over hunting           |                                     |
| 20/10/2011 | environment        | alteration                                 |        |        | Oct-11 | Aragon                                                                                                                       | 2  | periodico de aragon | because of weakness of animals                                                         | mentioned again on 5.11             |
| 20/10/2011 | agriculture        | losses in rainfed agriculture              | Oct-10 | Oct-11 |        | Aragon                                                                                                                       | 2  | periodico de aragon | migratory birds delay, no mushrooms, flower blossoming out of season                   |                                     |
| 20/10/2011 | agriculture        | losses in irrigated agriculture            | Oct-10 | Oct-11 |        | Aragon                                                                                                                       | 2  | periodico de aragon | 90M euros                                                                              |                                     |
| 20/10/2011 | agriculture        | losses in livestock production             | Oct-10 | Oct-11 |        | Aragon                                                                                                                       | 2  | periodico de aragon | 62M euros (because of the reduction in the surface of corn and rice crops)             |                                     |
| 21/10/2011 | society            | rogations                                  | Oct-11 |        |        | Epila                                                                                                                        | 5  | periodico de aragon | 18M euros (ovine), 1.5M euros (bovine), 1.5 (apiculture)                               | mentioned again on 25.10            |
| 23/10/2011 | wildlife           | fishes rescued                             | Oct-11 |        |        | Huerva                                                                                                                       | 14 | periodico de aragon | to ask for rain                                                                        |                                     |
|            |                    |                                            |        |        |        |                                                                                                                              |    |                     | not enough water for the fishes, risk of death because of lack of oxigen.              |                                     |
| 28/10/2011 | environment        | reduced flow                               | Oct-11 |        | Dec-11 | Cinca, Gallego and Ebro from Mequinzena                                                                                      | 14 | periodico de aragon | Technicians intervene to save local species                                            |                                     |
| 29/10/2011 | livestock          | increased costs                            |        |        | Oct-11 | Aragon                                                                                                                       | 2  | periodico de aragon | reservoir withdrawal commission decides to reduce the environmental flow,              | again on 30.12                      |
| 29/10/2011 | agriculture        | damage                                     |        |        | Oct-11 | Aragon                                                                                                                       | 2  | periodico de aragon | new reduction for Gallego and Cinca on (30.12)                                         | mentioned again on 23.02, 04.03     |
| 04/01/2012 | agriculture        | sprout problems                            |        |        | Jan-12 | Riegos del Alto Aragon                                                                                                       | 14 | periodico de aragon | because of lack of pastures, lack of rain since July                                   | ongoing on 12.03.12, again on 27.03 |
| 22/12/2011 | agriculture        | crop change                                | Dec-11 |        |        | Riegos del Alto Aragon                                                                                                       | 14 | periodico de aragon | olive trees and nut trees, lack of rain since July                                     | mentioned again on 08.01, 10.02     |
| 12/01/2012 | agriculture        | crop change                                | Jan-11 |        |        | Riegos del Alto Aragon                                                                                                       | 14 | periodico de aragon | a week of irrigation aproved                                                           | mentioned again on 22.03.12         |
|            |                    |                                            |        |        |        |                                                                                                                              |    |                     | recommendation of planting winter cereal to save water                                 |                                     |
| 08/02/2012 | water supply       | reduced quality                            | Jun-11 | Aug-12 |        | Zaragoza                                                                                                                     | 5  | periodico de aragon | spring crops (rice and wheat) replaced with wheat to save water (25% increase)         |                                     |
| 17/02/2012 | fire               | increased risk                             | Mar-12 |        |        | Aragon                                                                                                                       | 2  | periodico de aragon | supply from Yesa interrupted due to lack of water. Substituted by other sources of     | mentioned before, finished 07.08    |
| 21/02/2012 | fire               | fires                                      | Feb-12 |        |        | Zaragoza (province) and Cinco Villas                                                                                         | 4  | periodico de aragon | less quality                                                                           |                                     |
| 21/02/2012 | social             | rogations                                  | Feb-12 |        |        | Zaragoza                                                                                                                     | 5  | periodico de aragon | period of restrictions brought 1 month forward                                         |                                     |
| 26/02/2012 | agriculture        | irrigation campaign delayed                | Feb-12 |        |        | Canal de Aragon y Cataluña                                                                                                   | 14 | periodico de aragon | fires because of dryness                                                               |                                     |
| 27/02/2012 | agriculture        | damage                                     |        |        | Feb-12 | Huesca                                                                                                                       | 3  | periodico de aragon | to ask for rain                                                                        |                                     |
| 28/02/2012 | agriculture        | low quota                                  | Mar-12 |        |        | Riegos del Alto Aragon                                                                                                       | 14 | periodico de aragon | used to be the 1st of March, decision to delay it                                      |                                     |
| 04/03/2012 | agriculture        | damage                                     |        |        | Mar-12 | Teruel                                                                                                                       | 3  | periodico de aragon | 40-50% of rainfed cereal crops affected (23.05 40-50% of winter cereal lost)           |                                     |
| 04/03/2012 | water supply       | to villages                                |        |        | Mar-12 | La Puebla de Valverde (Teruel)                                                                                               | 5  | periodico de aragon | start of the irrigation compaign with the lowest quotas in 40 years                    |                                     |
| 04/03/2012 | water supply       | to villages                                |        |        | Mar-12 | La Portellada (Teruel)                                                                                                       | 5  | periodico de aragon | almond trees losing the flowers, small olives and grapes                               |                                     |
| 04/03/2012 | agriculture        | water curtailments                         | Oct-11 |        |        | Lower Ebro (from Mequinzena)                                                                                                 | 15 | periodico de aragon | dry spring, water tank trucks required                                                 |                                     |
| 05/03/2012 | agriculture        | water curtailments                         | Mar-12 |        |        | Canal de Aragon                                                                                                              | 14 | periodico de aragon | pluted aquifer, water tank trucks required                                             |                                     |
| 10/03/2012 | fire               | fire                                       | Mar-12 |        |        | Cantanea (Pyrenees)                                                                                                          | 6  | periodico de aragon | water curtailments to irrigation                                                       |                                     |
| 11/03/2012 | agriculture        | truffle recolection problems               |        |        | Mar-12 | Huesca                                                                                                                       | 3  | periodico de aragon | irrigation campaign started with quotas half at 50% (compared to normal year)          |                                     |
| 13/03/2012 | fire               | fires                                      | Jan-12 | Feb-12 |        | Aragon                                                                                                                       | 2  | periodico de aragon | fire in winter, extreme dryness favours fast expansion of the fire                     |                                     |
| 13/03/2012 | agriculture        | damage                                     |        |        | Mar-12 | Aragon                                                                                                                       | 2  | periodico de aragon | problems in the sector, truffels require moisture to reproduce (little rain since Dec) | again on 22.03                      |
| 13/03/2012 | fire               | fire risk                                  | Mar-12 |        |        | Aragon                                                                                                                       | 2  | periodico de aragon | 172 fires                                                                              |                                     |
| 16/03/2012 | livestock          | increased costs                            |        |        | Mar-12 | Huesca                                                                                                                       | 2  | periodico de aragon | especially on wheat, broad beans and coliflower                                        |                                     |
| 18/03/2012 | agriculture        | economic losses                            |        |        | Mar-12 | Aragon                                                                                                                       | 2  | periodico de aragon | maxim alert level will be activated 3 months in advance (mid March)                    |                                     |
| 18/03/2012 | apiculture         | flowering reduced                          |        |        | Mar-12 | Aragon                                                                                                                       | 2  | periodico de aragon | lack of pastures                                                                       |                                     |
|            |                    |                                            |        |        |        |                                                                                                                              |    |                     | irreversible damage, losses of 355M in cereal and fodder                               | again on 21.03                      |
|            |                    |                                            |        |        |        |                                                                                                                              |    |                     | shorter flowering period, loss of flowers, less nectar                                 |                                     |
| 21/03/2012 | economy            | economic losses                            |        |        | Mar-12 | Spain                                                                                                                        | 1  | periodico de aragon | 1500M estimated losses in the primary sector (mainly in winter cereal and extensive    | again on 21.03                      |
| 21/03/2012 | agriculture        | water curtailments                         |        |        | Mar-12 | Riegos del Alto Aragon                                                                                                       | 14 | periodico de aragon | livestock farming)                                                                     | ongoing on 31.03, 02.04, 28.04      |
| 25/03/2012 | agriculture        | damage                                     |        |        | Mar-12 | Epila                                                                                                                        | 5  | periodico de aragon | drought affected rainfed crops such as vine, olive trees and almond trees since 2011   |                                     |
|            |                    |                                            |        |        |        |                                                                                                                              |    |                     | last year 12.000 temporal workers were employed to harvest cherries, this year only    |                                     |
| 12/04/2012 | economy            | jobs reduction                             | Apr-12 |        |        | Caspe (Zaragoza) (among other cases)                                                                                         | 5  | periodico de aragon | 3000 are required                                                                      |                                     |
| 18/04/2012 | fire               | fires                                      | Jan-12 | Mar-12 |        | Aragon                                                                                                                       | 2  | periodico de aragon | 280 fires, aprox 2700 has burned (mainly in Ribagorza , 19.04)                         |                                     |
| 19/04/2012 | agriculture        | yield reduction                            | Mar-11 | Sep-11 |        | Aragon                                                                                                                       | 2  | periodico de aragon | 17.2% yield reduction in vine, reduction in olive oil production                       |                                     |
| 26/04/2012 | livestock          | increase of costs                          |        |        | Apr-12 | Spain                                                                                                                        | 1  | periodico de aragon | increased demand of hay because of lack of fodder and pastures                         |                                     |
| 28/04/2012 | agriculture        | crop losses                                |        |        | Apr-12 | Riegos del Alto Aragon                                                                                                       | 14 | periodico de aragon | first harvest of corn crops lost                                                       |                                     |
| 03/05/2012 | social             | rogations                                  | Mar-12 | Mar-12 |        | Lecera                                                                                                                       | 5  | periodico de aragon | to ask for rain                                                                        |                                     |
| 06/05/2012 | environment        | wetland birds                              |        |        | May-12 | Villarquemado wetland                                                                                                        | 5  | periodico de aragon | birds at risk during nidification period                                               |                                     |
| 25/05/2012 | agriculture        | crops loss                                 |        |        | May-12 | Robres (Monegros)                                                                                                            | 5  | periodico de aragon | winter cereal production completely lost                                               |                                     |
| 14/06/2012 | agriculture        | yield reduction                            |        |        | Jun-12 | Aragon                                                                                                                       | 2  | periodico de aragon | rice production 39% less than 2011                                                     |                                     |
| 31/07/2012 | environment        | increase of macrophytes                    |        |        | Jul-12 | Ebro basin                                                                                                                   | 11 | periodico de aragon | because of lack of high flows that clean the rivers                                    |                                     |
| 03/08/2012 | water supply       | water tank trucks required                 |        |        | Aug-12 | Teruel                                                                                                                       | 3  | periodico de aragon | supply required in 7 towns (13.08, 10 towns)                                           |                                     |
| 20/08/2012 | water supply       | water tank trucks required                 |        |        | Aug-12 | Aragon                                                                                                                       | 2  | periodico de aragon | around 30 towns                                                                        |                                     |
| 27/08/2012 | agriculture        | yield reduction                            | Aug-12 |        |        | Somontano, Campo de Borja y Calatayud                                                                                        | 4  | periodico de aragon | reduction around 15-20%                                                                |                                     |
|            |                    |                                            |        |        |        |                                                                                                                              |    |                     | because of drought trees break easily during a strong wind episode, creating chaos in  |                                     |
| 11/09/2012 | environment        | fragile trees                              |        |        | Sep-12 | Zaragoza                                                                                                                     | 5  | periodico de aragon | Zaragoza city                                                                          |                                     |
|            |                    |                                            |        |        |        |                                                                                                                              |    |                     | official figures: 254M (89M in irrigated agriculture and 165M in rainfed agriculture), |                                     |
| 17/09/2012 | agriculture        | economic loss                              | Oct-11 | Sep-12 |        | Aragon                                                                                                                       | 2  | periodico de aragon | corrected to 277M (12.10)                                                              |                                     |
|            |                    |                                            |        |        |        |                                                                                                                              |    |                     | 30% of land left fallow (70M lost),                                                    |                                     |
| 23/09/2012 | agriculture        | production reduction                       | Oct-11 | Sep-12 |        | Riegos del Alto Aragon                                                                                                       | 14 | periodico de aragon | reduction affects mainly rice and (long cycle) corn crops                              |                                     |
| 23/09/2012 | agriculture        | production reduction                       | Oct-11 | Sep-12 |        | Riegos del Alto Aragon                                                                                                       | 14 | periodico de aragon | first cuts of alfalfa very weak (due to lack of rain during the spring)                |                                     |
| 28/09/2012 | livestock          | demostration                               | Sep-12 | Sep-12 |        | Aragon                                                                                                                       | 2  | periodico de aragon | to claim for changes in the PAC, fair prices and measures against drought              |                                     |
|            |                    |                                            |        |        |        |                                                                                                                              |    |                     | 110M losses in rainfed cereal and fodder, 1M tons cereals less than 2011,              |                                     |
| 12/10/2012 | agriculture        | economic losses                            | Oct-11 | Oct-12 |        | Aragon                                                                                                                       | 2  | periodico de aragon | 252M losses in rainfed and irrigated cereal                                            |                                     |

|                            |                          |        |        |              |                       |                                                                               |
|----------------------------|--------------------------|--------|--------|--------------|-----------------------|-------------------------------------------------------------------------------|
| 12/10/2012 agriculture     | economic losses          | Oct-11 | Oct-12 | Hoya Huesca  | 4 periodico de aragon | 48.4M losses in irrigated and rain fed cereal                                 |
| 12/10/2012 agriculture     | economic losses          | Oct-11 | Oct-12 | Cinco Villas | 4 periodico de aragon | 33.7M losses in irrigated and rain fed cereal                                 |
| 12/10/2012 agriculture     | economic losses          | Oct-11 | Oct-12 | Monegros     | 4 periodico de aragon | 24.5M losses in irrigated and rain fed cereal                                 |
| 12/10/2012 agriculture     | economic losses          | Oct-11 | Oct-12 | Aragon       | 2 periodico de aragon | 10M losses in ovine and caprine, 6M in breeding cows                          |
| 13/10/2012 agriculture     | yield reduction          | Oct-11 | Oct-12 | Teruel       | 3 periodico de aragon | low production of saffron because of drought and high temperatures            |
| 15/10/2012 environment/hur | season start deleyed     |        |        | Oct-12 Borja | 4 periodico de aragon | start of the season delayed as some species had problems to breed             |
| 15/10/2012 agriculture     | yield reduction          | Oct-11 | Oct-12 | Aragon       | 2 periodico de aragon | because of drought                                                            |
| 28/10/2012 turism          | delayed mushrooms season | Oct-11 | Oct-12 | Pyrenees     | 6 periodico de aragon | 18% reduction in vine and 45% in olives                                       |
|                            |                          |        |        |              |                       | affects the turism. Solved with mid autumn rains                              |
|                            |                          |        |        |              |                       | winter cereal (wheat and barley) 350,000 tons less,                           |
|                            |                          |        |        |              |                       | corn 2ton/ha less (13% reduction), lower quality in fruit,                    |
| 20/12/2012 agriculture     | production reduction     | Oct-11 | Oct-12 | Huesca       | 3 periodico de aragon | reduced production of nuts in drought areas, 16% reduction in vine production |
